# Supplementary material for: Deep learning of SARS-CoV-2 outbreak phylodynamics with contact tracing data
Source: bioRxiv or medRxiv preprint supplement (doi:10.1101/2024.06.10.24308687), 2024-06-11
Supplement: Supplementary file [file media-1.pdf]

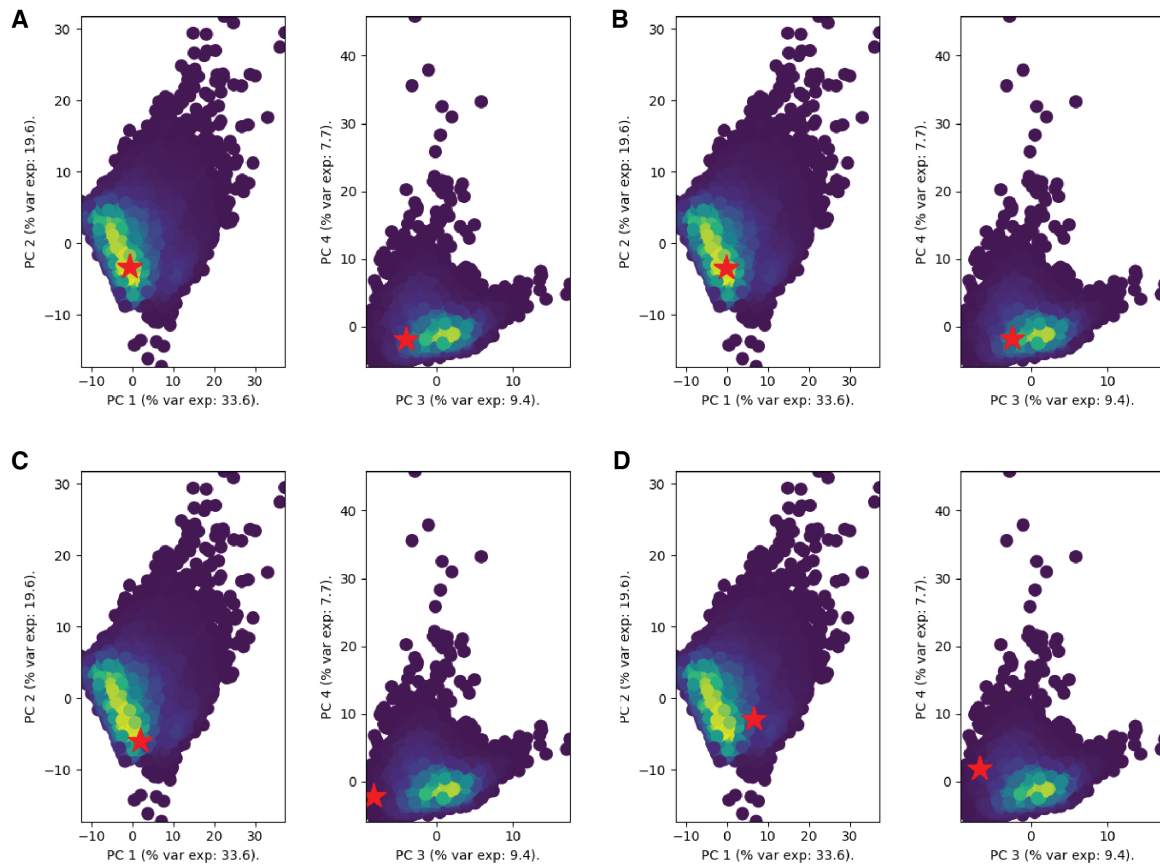

**Supplementary Figure 1** | PCA plots illustrating the third and fourth waves of SARS-CoV-2 in Hong Kong. For the third wave: Dated Resolved (A) and Dated Resolved-Cluster (B). For the fourth wave: Dated Resolved (C) and Dated Resolved-Cluster (D).

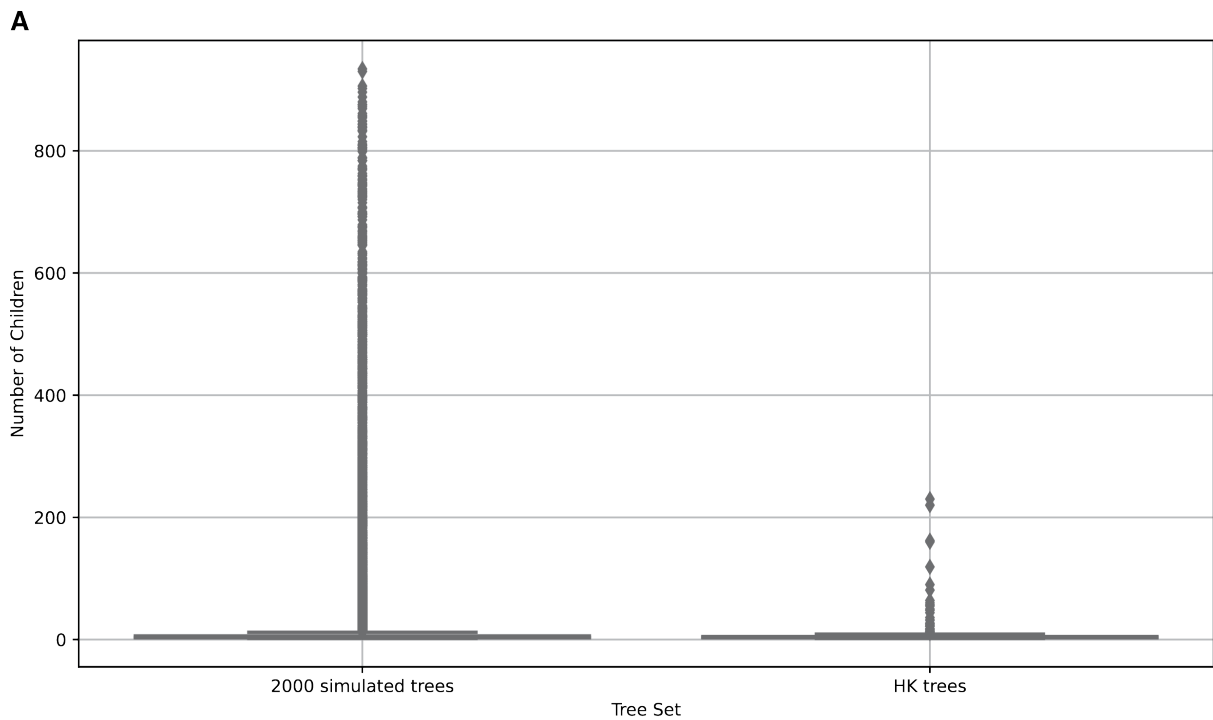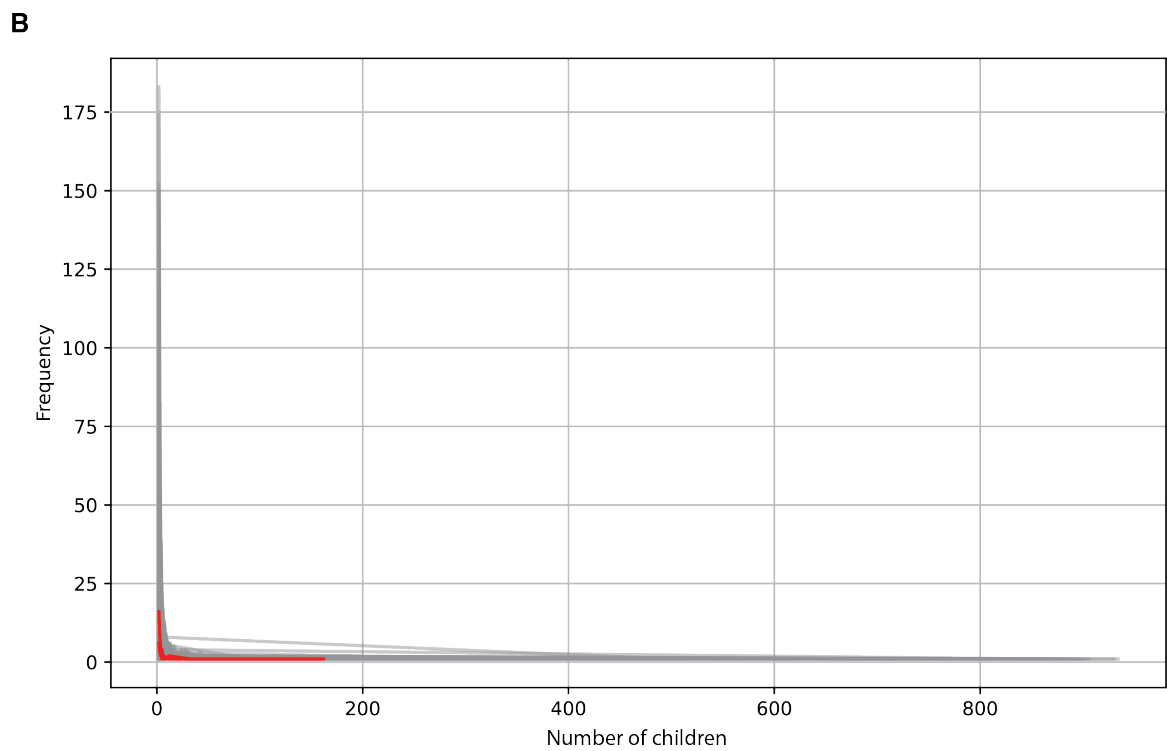

**Supplementary Figure 2** | A comparison of the distribution of internal node children between 2000 simulated trees and trees generated from SARS-CoV-2 sequences during waves 3 and 4 in Hong Kong. (A) Contrasts children per internal node in simulated trees (left) with those observed in SARS-CoV-2 trees (right). (B) Depicts internal node offspring frequency across

trees, with each line representing one simulated tree. 3rd and 4th wave occurrences are highlighted in red.

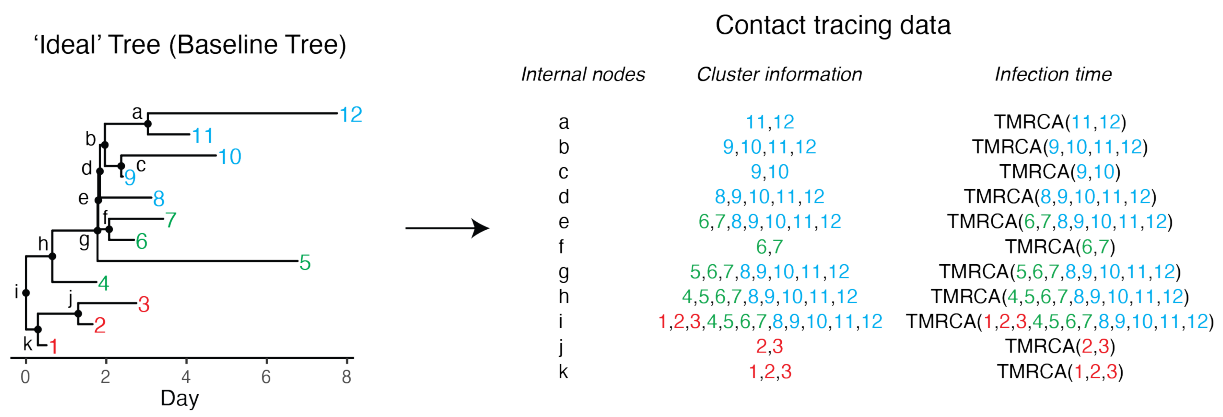

Supplementary Figure 3 | Extraction of contact tracing data from an "ideal" tree.

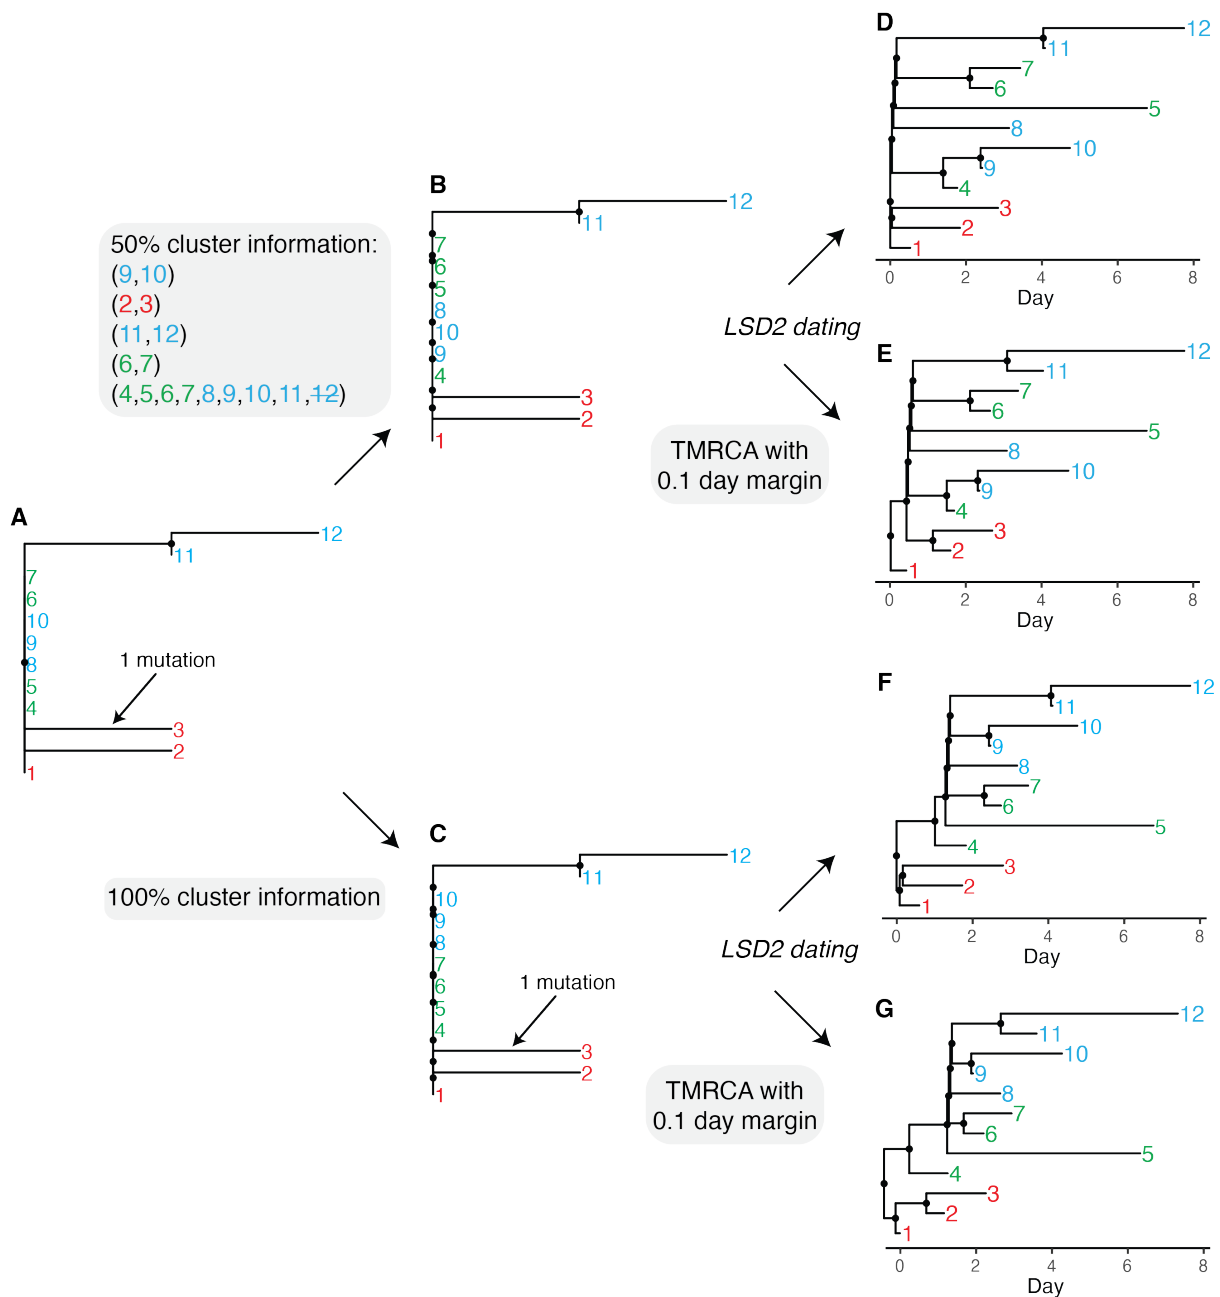

**Supplementary Figure 4** | Resolving polytomies in the Genetic Tree using contact tracing data. (A) The initial Genetic Polytomous Tree, as in Fig. 1. (B) Tree resolved with 50% cluster information; notably, the inclusion of sample '12' in the fifth cluster does not alter the resolution outcome per our methodology. Polytomies lacking cluster information were randomly resolved into a binary tree. (C) Fully resolved tree with 100% cluster information, matching the Genetic Baseline Tree in Fig. 1. (D, E) Dated trees from tree in Panel (B) using LSD2, without and with temporal constraints from known 50% clusters, respectively. (F) Tree from Panel (C) dated using LSD2, corresponding to the Dated Baseline Tree in Fig. 1. (G)

Tree from Panel (C) dated using LSD2 with temporal constraints applied to all clusters, closely resembling the “ideal” tree in **Fig. 1**.

**Supplementary Table 1** | Performance comparison (mean relative error) of models trained on seven types of phylogenetic trees.

| Model                    | $R_0$             | <i>Infectious period</i> | $X_{ss}$         | $f_{ss}$         |
|--------------------------|-------------------|--------------------------|------------------|------------------|
| Baseline-Model           | 0.095<br>(0.382)* | 0.092<br>(0.561)         | 0.215<br>(0.721) | 0.167<br>(0.598) |
| Dated Baseline-Model     | 0.103<br>(0.306)  | 0.122<br>(0.566)         | 0.268<br>(0.648) | 0.200<br>(0.465) |
| Dated Polytomous-Model   | 0.136             | 0.196                    | 0.449            | 0.357            |
| Dated Resolved-Model     | 0.119             | 0.155                    | 0.444            | 0.367            |
| Genetic Baseline-Model   | 0.205<br>(0.664)  | 0.191<br>(0.523)         | 0.314<br>(0.798) | 0.265<br>(0.602) |
| Genetic Polytomous-Model | 0.232             | 0.192                    | 0.454            | 0.361            |
| Genetic Resolved-Model   | 0.261             | 0.214                    | 0.480            | 0.360            |

\*Values in parentheses represent performance metrics tested with realistic phylogenetic trees: the Baseline-Model and Dated Baseline-Model analyses utilized Dated Resolved trees, whereas the Genetic Baseline-Model employed Genetic Resolved trees for evaluation.

**Supplementary Table 2** | Performance comparison (mean relative error) by incorporating varying levels of contact tracing data based on Baseline-Model and Dated Baseline-Model.

| <b>Model</b>         | <b>Percentage of contact tracing data</b> | <b><math>R_0</math></b> | <b><i>Infectious period</i></b> | <b><math>X_{ss}</math></b> | <b><math>f_{ss}</math></b> |
|----------------------|-------------------------------------------|-------------------------|---------------------------------|----------------------------|----------------------------|
| Baseline-Model       | 0%                                        | 0.382                   | 0.561                           | 0.721                      | 0.598                      |
|                      | 25%                                       | 0.198                   | 0.193                           | 0.667                      | 0.544                      |
|                      | 50%                                       | 0.154                   | 0.165                           | 0.524                      | 0.467                      |
|                      | 75%                                       | 0.154                   | 0.178                           | 0.395                      | 0.370                      |
|                      | 100%                                      | 0.165                   | 0.196                           | 0.302                      | 0.308                      |
|                      |                                           |                         | (0.101)*                        | (0.109)                    | (0.222)                    |
| Dated Baseline-Model | 0%                                        | 0.306                   | 0.566                           | 0.648                      | 0.465                      |
|                      | 25%                                       | 0.156                   | 0.200                           | 0.485                      | 0.364                      |
|                      | 50%                                       | 0.124                   | 0.150                           | 0.392                      | 0.285                      |
|                      | 75%                                       | 0.111                   | 0.132                           | 0.323                      | 0.229                      |
|                      | 100%                                      | 0.103                   | 0.120                           | 0.266                      | 0.187                      |
|                      |                                           |                         |                                 |                            |                            |

*\*Values in parentheses represent performance metrics tested with a time constraint margin of 0.1 day.*



**Supplementary Table 3** | Summary of out-of-range SS for waves 3 and 4 compared to simulated values in Dated Baseline-Model.

| Features                                          | Max    | Min   | <i>Dated Resolved</i><br>(wave 3) | <i>Dated Resolved-Cluster</i><br>(wave 3) | <i>Dated Resolved</i><br>(wave 4) | <i>Dated Resolved-Cluster</i><br>(wave 4) |
|---------------------------------------------------|--------|-------|-----------------------------------|-------------------------------------------|-----------------------------------|-------------------------------------------|
| Mean length of transmission chain                 | 2.979  | 0.548 | 0.643                             | 0.676                                     | <b>0.247*</b>                     | <b>0.452</b>                              |
| The 4 <sup>th</sup> deciles of transmission chain | 2.155  | 0.019 | 0.050                             | 0.053                                     | <b>0.015</b>                      | 0.029                                     |
| The 5 <sup>th</sup> deciles of transmission chain | 2.552  | 0.028 | 0.050                             | 0.053                                     | <b>0.015</b>                      | 0.029                                     |
| The 6 <sup>th</sup> deciles of transmission chain | 2.948  | 0.043 | 0.050                             | 0.288                                     | <b>0.015</b>                      | 0.177                                     |
| The 7 <sup>th</sup> deciles of transmission chain | 3.778  | 0.065 | 0.156                             | 0.559                                     | <b>0.015</b>                      | 0.456                                     |
| The 8 <sup>th</sup> deciles of transmission chain | 4.789  | 0.102 | 0.651                             | 0.883                                     | <b>0.016</b>                      | 0.621                                     |
| Max length of transmission chain                  | 29.365 | 2.146 | 5.372                             | 4.453                                     | <b>2.115</b>                      | 3.270                                     |

*\*Values highlighted in bold exceed the established maximum and minimum range thresholds.*

**Supplementary Table 4** | Summary of out-of-range SS for waves 3 and 4 compared to simulated values in PhyloDeep.

| <b>Features</b>                                    | <b>Max</b> | <b>Min</b> | <b><i>Dated Resolved (wave 3)</i></b> | <b><i>Dated Resolved (wave 4)</i></b> |
|----------------------------------------------------|------------|------------|---------------------------------------|---------------------------------------|
| Median of all branch length                        | 0.939      | 0.520      | <b>0.445*</b>                         | <b>0.402</b>                          |
| Variance of all branch length                      | 1.636      | 0.590      | <b>1.737</b>                          | <b>1.886</b>                          |
| Variance of external branch length                 | 2.095      | 0.363      | <b>2.288</b>                          | <b>2.622</b>                          |
| Mean length of transmission chain                  | 2.481      | 0.929      | <b>0.643</b>                          | <b>0.247</b>                          |
| The 2 <sup>nd</sup> deciles of transmission chain  | 1.382      | 0.186      | <b>0.050</b>                          | <b>0.015</b>                          |
| The 3 <sup>rd</sup> deciles of transmission chain  | 1.663      | 0.298      | <b>0.050</b>                          | <b>0.015</b>                          |
| The 4 <sup>th</sup> deciles of transmission chain  | 1.867      | 0.411      | <b>0.050</b>                          | <b>0.015</b>                          |
| The 5 <sup>th</sup> deciles of transmission chain  | 2.063      | 0.522      | <b>0.050</b>                          | <b>0.015</b>                          |
| The 6 <sup>th</sup> deciles of transmission chain  | 2.257      | 0.627      | <b>0.050</b>                          | <b>0.015</b>                          |
| The 7 <sup>th</sup> deciles of transmission chain  | 2.672      | 0.775      | <b>0.156</b>                          | <b>0.015</b>                          |
| The 8 <sup>th</sup> deciles of transmission chain  | 3.178      | 0.862      | <b>0.651</b>                          | <b>0.016</b>                          |
| The 9 <sup>th</sup> deciles of transmission chain  | 3.635      | 1.214      | 1.257                                 | <b>0.345</b>                          |
| The 10 <sup>th</sup> deciles of transmission chain | 5.241      | 1.419      | 2.071                                 | <b>0.859</b>                          |
| Max length of transmission chain                   | 15.296     | 2.189      | 5.372                                 | <b>2.115</b>                          |

*\*Values highlighted in bold exceed the established maximum and minimum range thresholds.*

Supplementary Table 5 | Parameter ranges used for simulations.

| Parameters        | Range in PhyloDeep | Range in this study  |
|-------------------|--------------------|----------------------|
| $R_0$             | (1, 5)             | <b>(0.4, 6)*</b>     |
| Infectious period | (1, 10)            | (1, <b>14</b> )      |
| $X_{ss}$          | (3, 10)            | <b>(2, 40)</b>       |
| $f_{ss}$          | (0.05, 0.20)       | (0.05, <b>0.25</b> ) |
| $k$               | (0.33, 0.90)       | <b>(0.09, 1.18)</b>  |
| $Tips$            | (200, 500)         | (200, <b>1000</b> )  |

\*Values highlighted in bold indicate the adjusted boundary values.
